# Supplementary material for: A double co-sensitization strategy using heteroleptic transition metal ferrocenyl dithiocarbamate phenanthrolene-dione for enhancing the performance of N719-based DSSCs
Source: Royal Society of Chemistry journal article supplement (doi:10.1039/d2ra05601a), 2022-01-01
Supplement: d2ra05601a1.pdf [file d2ra05601a1.pdf]

## Electronic Supporting Information

Heteroleptic Transition Metal Ferrocenyl dithiocarbamates with Phenanthroline Dione as  
Ameliorated Sensitizers/Co-Sensitizers for DSSCs

Amita Singh,<sup>a,b</sup> Devyani Srivastava,<sup>b</sup> Suresh W. Gosavi,<sup>c</sup> Ratna Chauhan,<sup>d\*</sup> Muthupandian  
Ashokkumar<sup>e</sup>, Mohd. Muddassir<sup>f</sup>, Abhinav Kumar,<sup>b\*</sup> and Abhinav Kumar<sup>b\*</sup>

<sup>a</sup>Department of Chemistry, Dr. Rammanohar Lohia Awadh University, Ayodhya-224001,  
India

<sup>b</sup>Department of Chemistry, Faculty of Science, University of Lucknow, Lucknow 226 007,  
India. Email: [abhinavmarshal@gmail.com](mailto:abhinavmarshal@gmail.com)

<sup>c</sup>Department of Physics, Savitribai Phule Pune University, Pune-411007, India.

<sup>d</sup>Department of Environmental Science, Savitribai Phule Pune University, Pune-411007,  
India. Email; [ratnasingh.bhu@gmail.com](mailto:ratnasingh.bhu@gmail.com)

<sup>e</sup>School of Chemistry, University of Melbourne, VIC 3010, Australia.

<sup>f</sup>Department of Chemistry, College of Sciences, King Saud University, Riyadh 11451, Saudi  
Arabia.

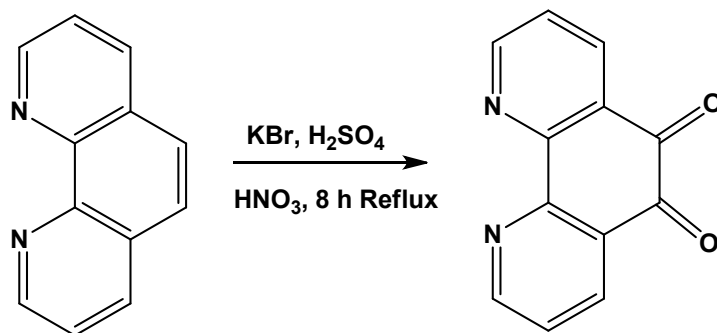

Scheme S1 ‡ - Preparation of 1,10-phenanthroline 5,6-dione

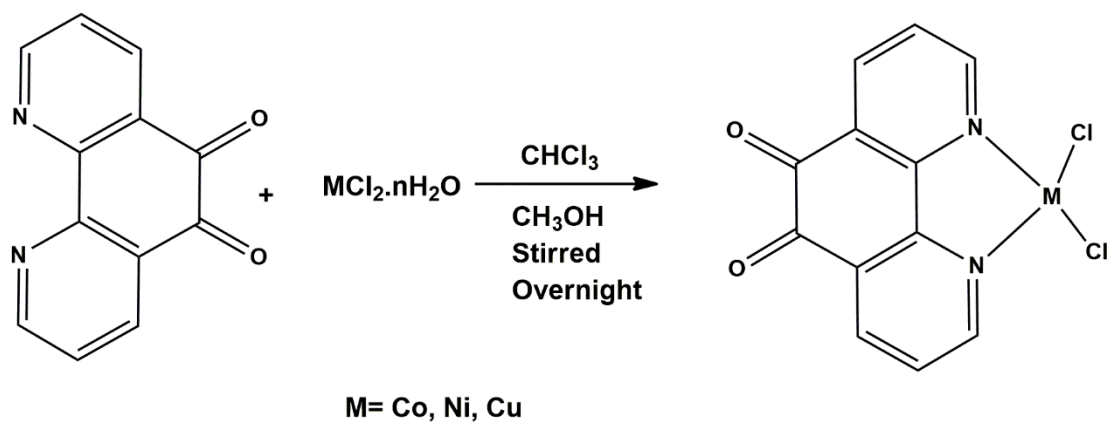

Scheme S2 $\ddagger$  - Syntheses of [M(Phen-dione)]
